# Supplementary material for: Stabilization of prebiotic vesicles by peptides depends on sequence and chirality
Source: Research Square preprint supplement (doi:10.21203/rs.3.rs-3136920/v1), 2023-07-12
Supplement: Supplementary file 1 [file ca572e8c8eea14a1f1952f78.docx]

**SUPPLEMENTARY INFORMATION**

**Supplementary table**

Structures of (A) amino acids, (B) dipeptides, (C) tripeptides, and (D) decanoic acid/decanoate in free and assembled forms.

A. Amino acids


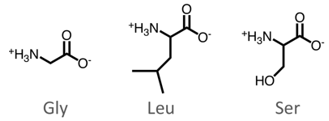


1. Dipeptides


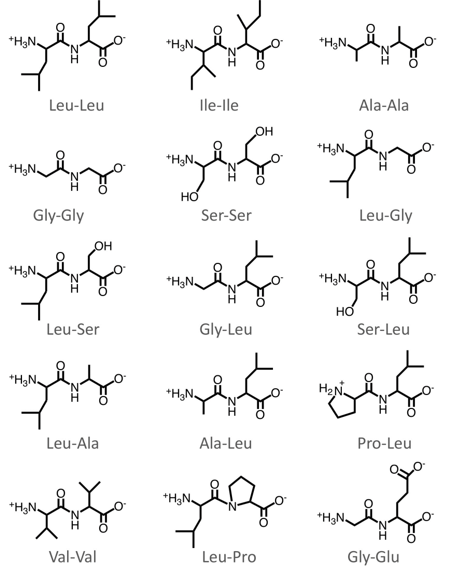


1. Tripeptides


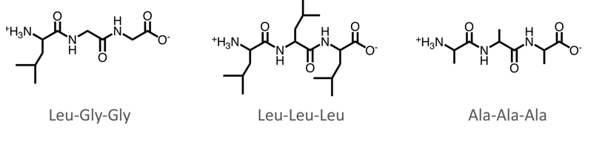


1. Decanoic acid/decanoate in free and assembled forms


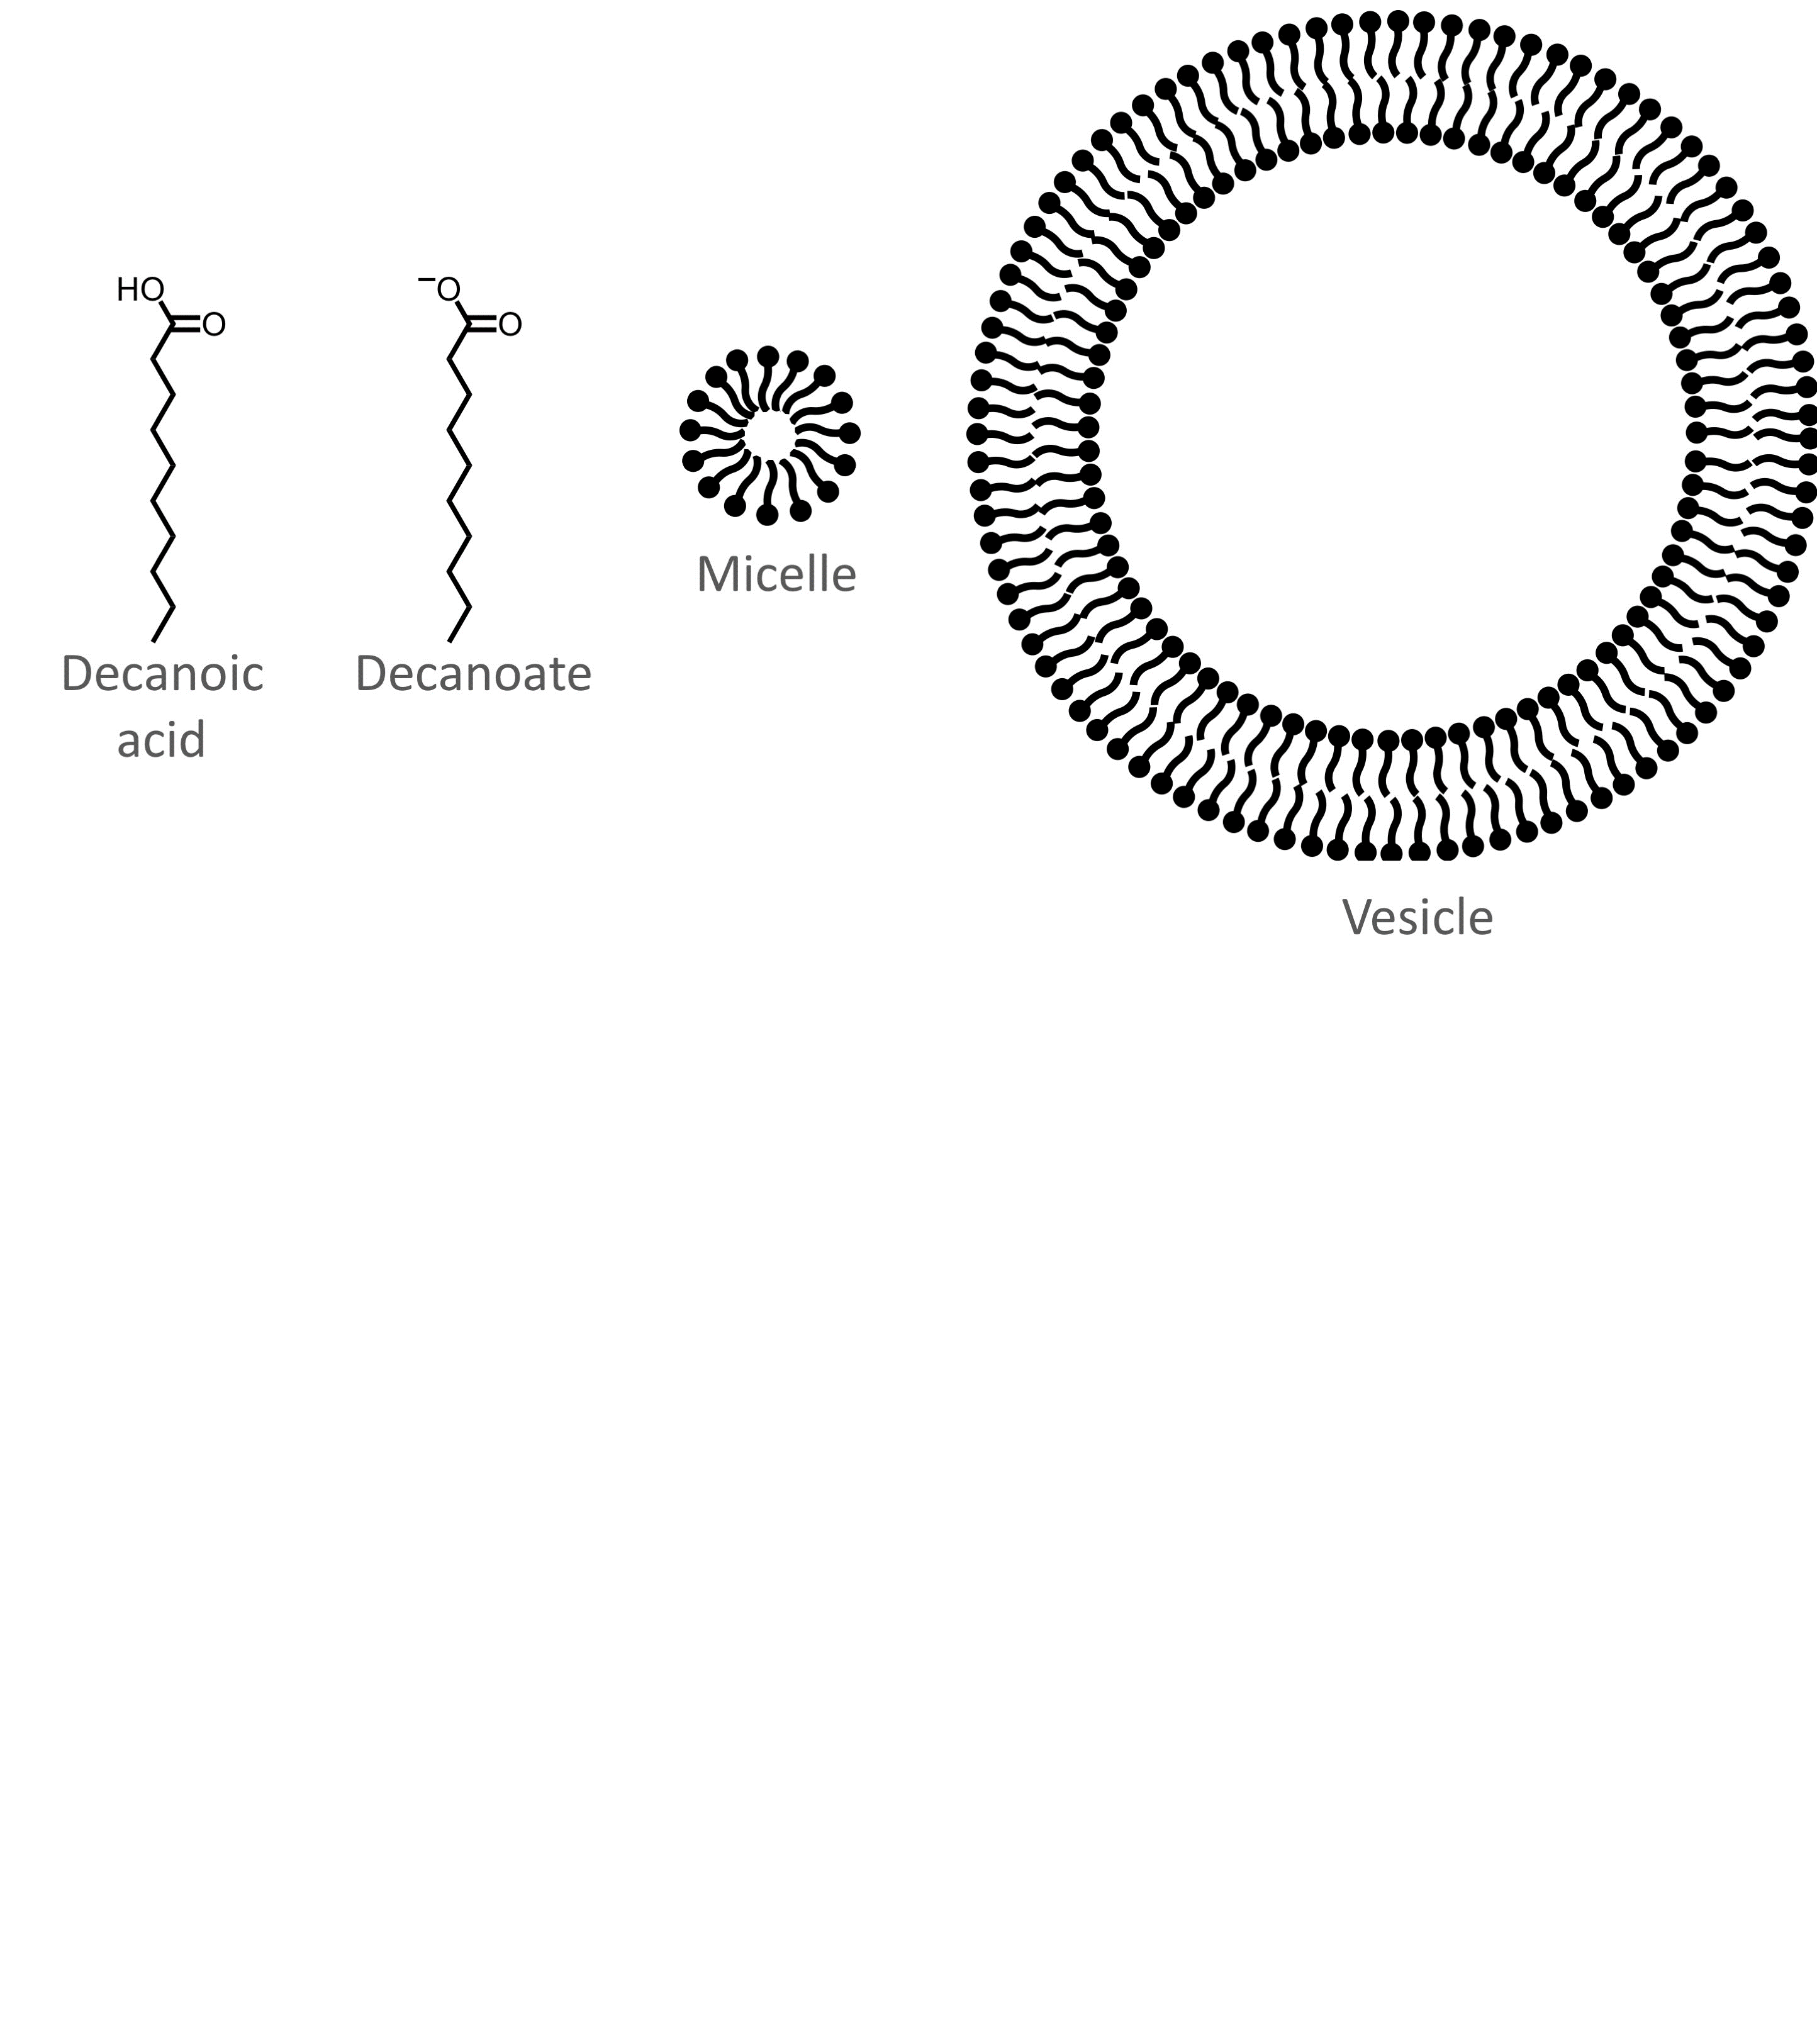


**Supplementary Videos**

Supplementary video 1. This video shows the docking of L-Leu-L-Leu to a dodecanoic acid bilayer as described in the Methods. Carbon atoms are cyan, hydrogen white, nitrogen dark blue, oxygen red, potassium ions brown and chloride ions blue. The video shows 20 ns of the 100 ns simulation.

Supplementary video 2. This video shows the docking of Ala-Ala to a dodecanoic acid bilayer as described in the Methods. Carbon atoms are cyan, hydrogen white, nitrogen dark blue, oxygen red, potassium ions brown and chloride ions blue. The video shows 20 ns of the 100 ns simulation.

Supplementary video 3. This video shows the docking of Leu-Ser to a dodecanoic acid bilayer as described in the Methods. Carbon atoms are cyan, hydrogen white, nitrogen dark blue, oxygen red, potassium ions brown and chloride ions blue. The video shows 20 ns of the 100 ns simulation.
